# Supplementary material for: Distribution and Species Richness of Benthic Polychaeta and Sipuncula in the Northwestern Pacific
Source: MDPI journal article supplement (doi:10.3390/d15040557), 2023-04-14
Supplement: s1 [file s1]

## Supplements

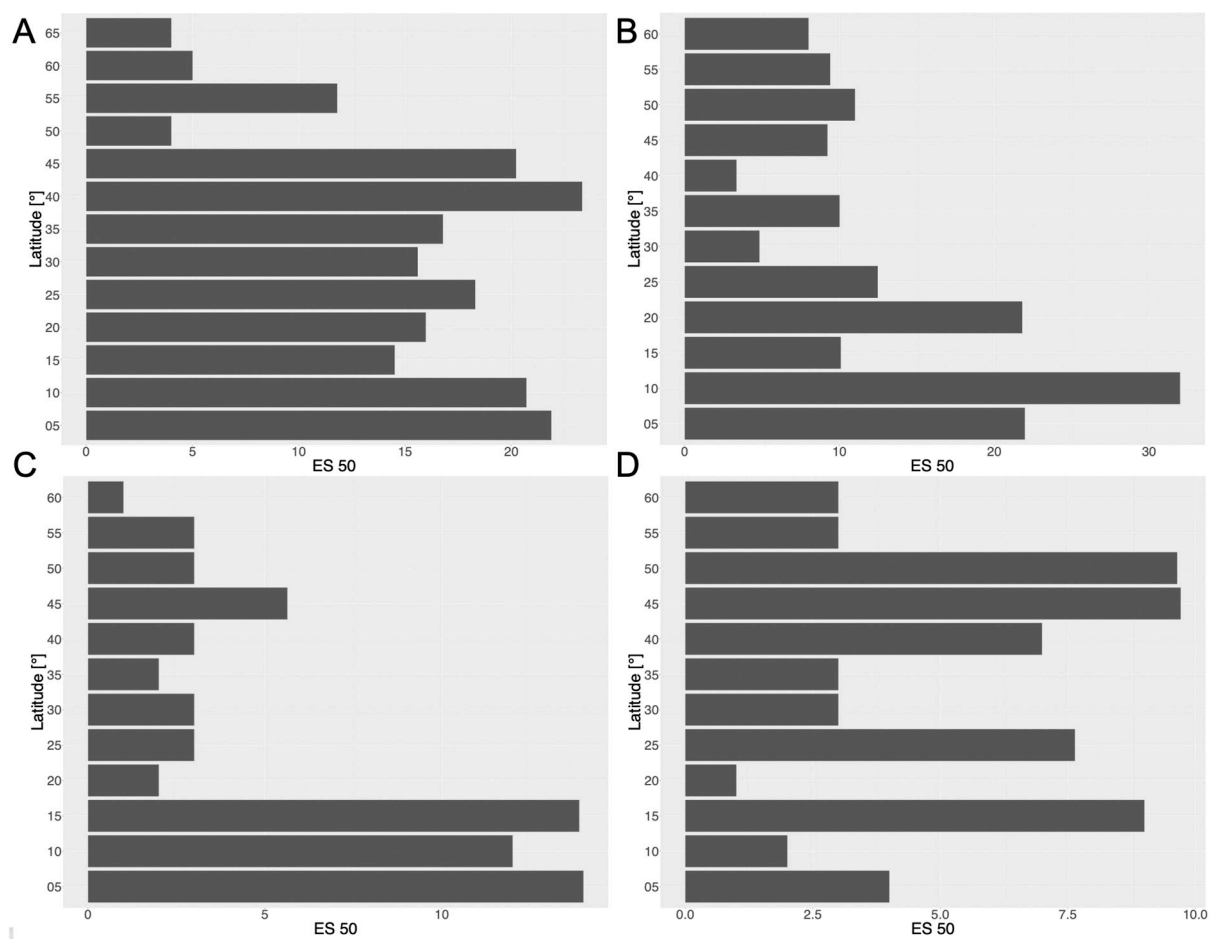

**Figure S1: Estimated species richness (ES50) for (A) shallow-water polychaetes, (B) deep-sea polychaetes, (C) shallow-water sipunculans and (D) deep-sea sipunculans in the Northwest Pacific.**

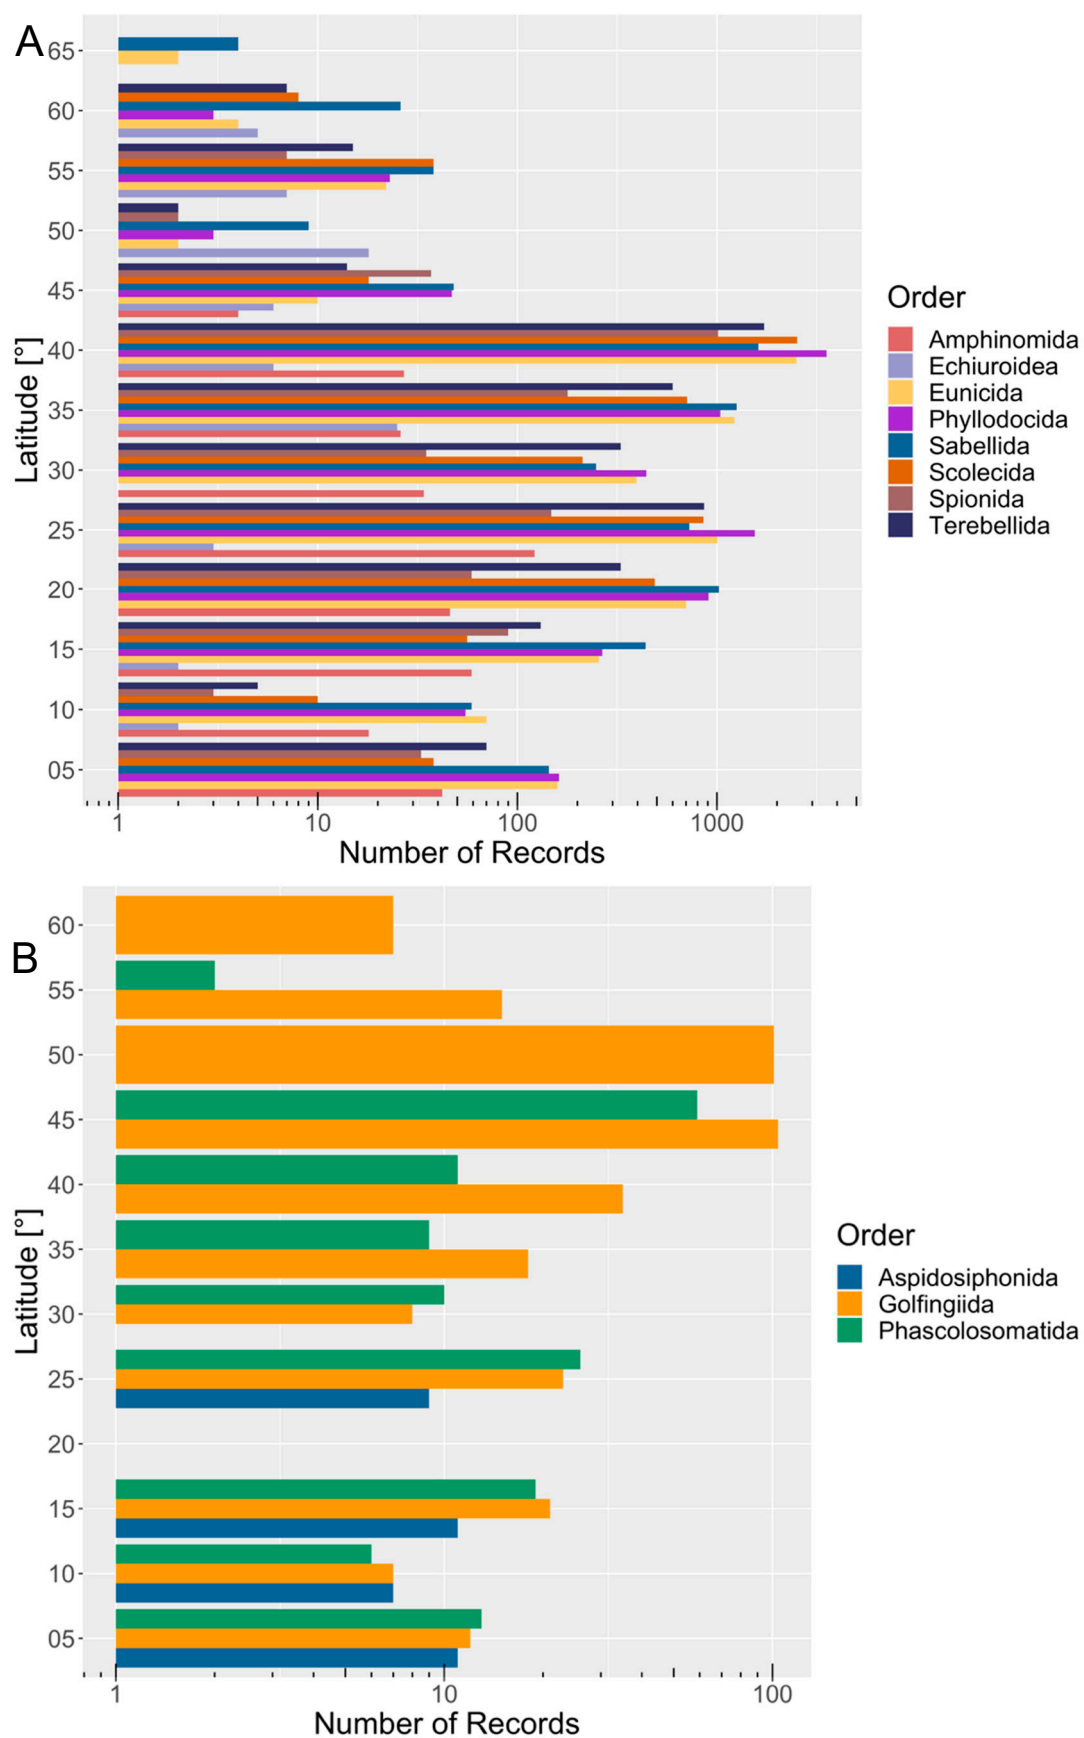

**Figure S2: Number of occurrence records for (A) Polychaeta order and (B) Sipuncula families per 5°-latitudinal bands in the Northwest Pacific. The x-axis are logarithmic.**

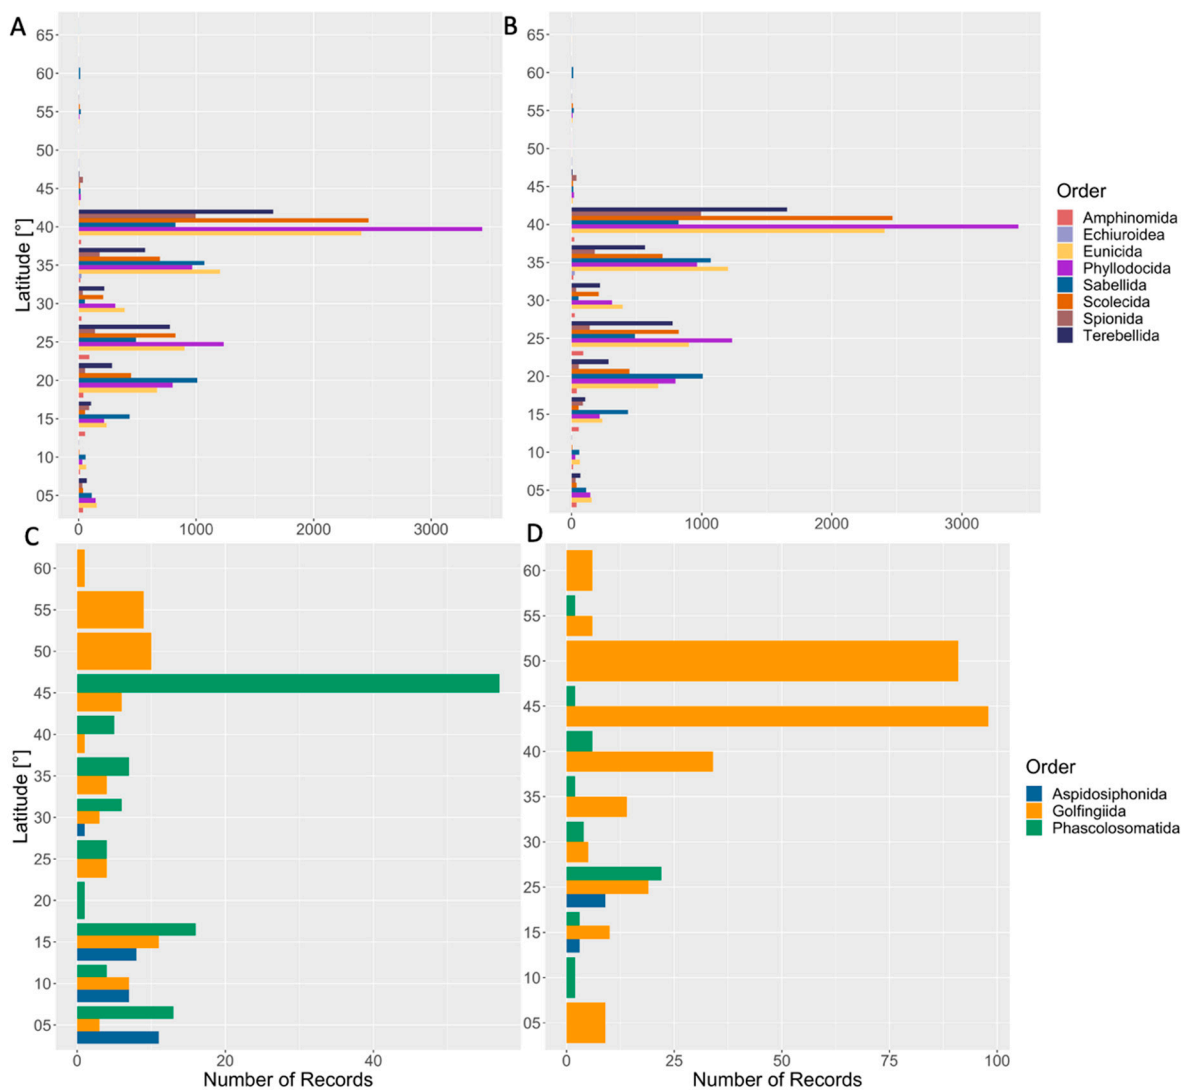

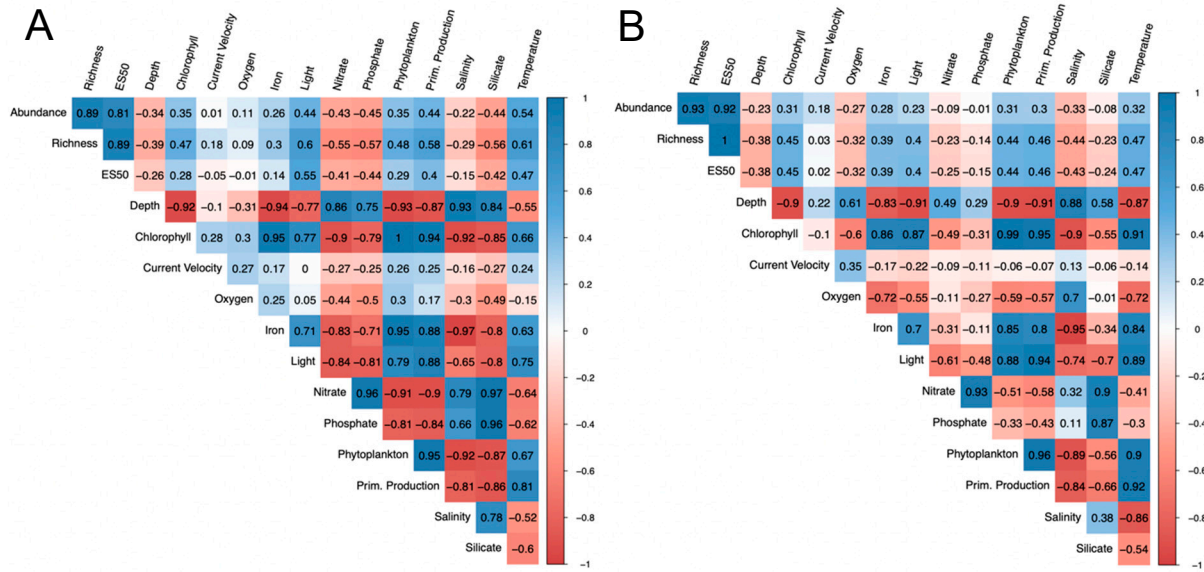

**Figure S4: Correlation matrices of biodiversity parameters and environmental factors in the Northwest Pacific for (A) Polychaeta and (B) Sipuncula on the 5 % confidence value.** The color red indicates a strong negative correlation while blue indicates a strong positive correlation. We used ORACLE-layers for the environmental factors and ran a Spearman correlation analysis between them and biodiversity parameters from the 700,000 km<sup>2</sup> hexagons: the species richness (number of species per hexagon), the abundance (number of occurrence records per hexagon) and the estimated species richness per hexagon (ES50).

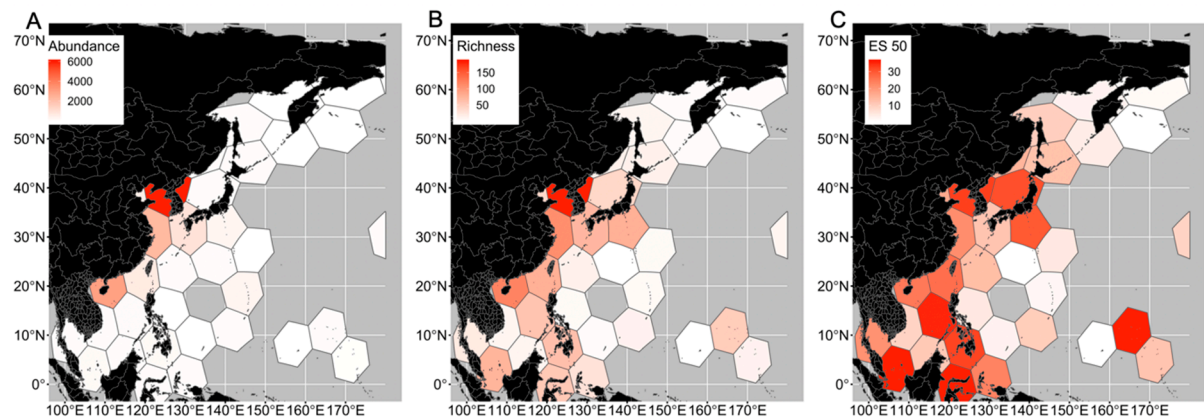

**Figure S5: Distribution and diversity of shallow-water Polychaeta and Sipuncula in the Northwest Pacific.** (A) Sampling effort (number of distribution records), (B) alpha species richness (number of species per hexagon), and (C) ES50 (estimated number of species) of benthic polychaetes and sipunculans in the NWP per 700,000 km<sup>2</sup> hexagons. Grey hexagons had zero values.

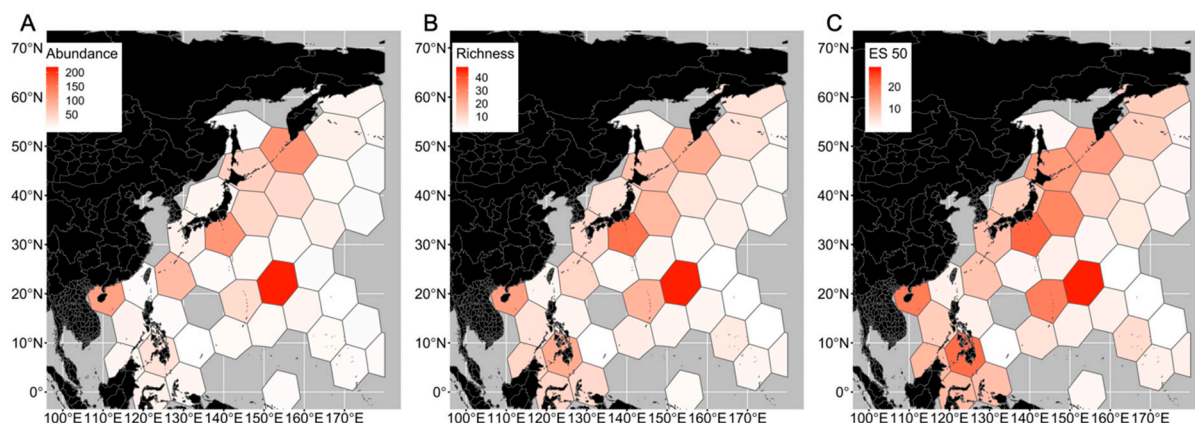

**Figure S6: Distribution and diversity of deep-sea Polychaeta and Sipuncula in the Northwest Pacific.** (A) Sampling effort (number of distribution records), (B) alpha species richness (number of species per hexagon), and (C) ES50 (estimated number of species) of benthic polychaetes and sipunculans in the NWP per 700,000 km<sup>2</sup> hexagons. Grey hexagons had zero values.

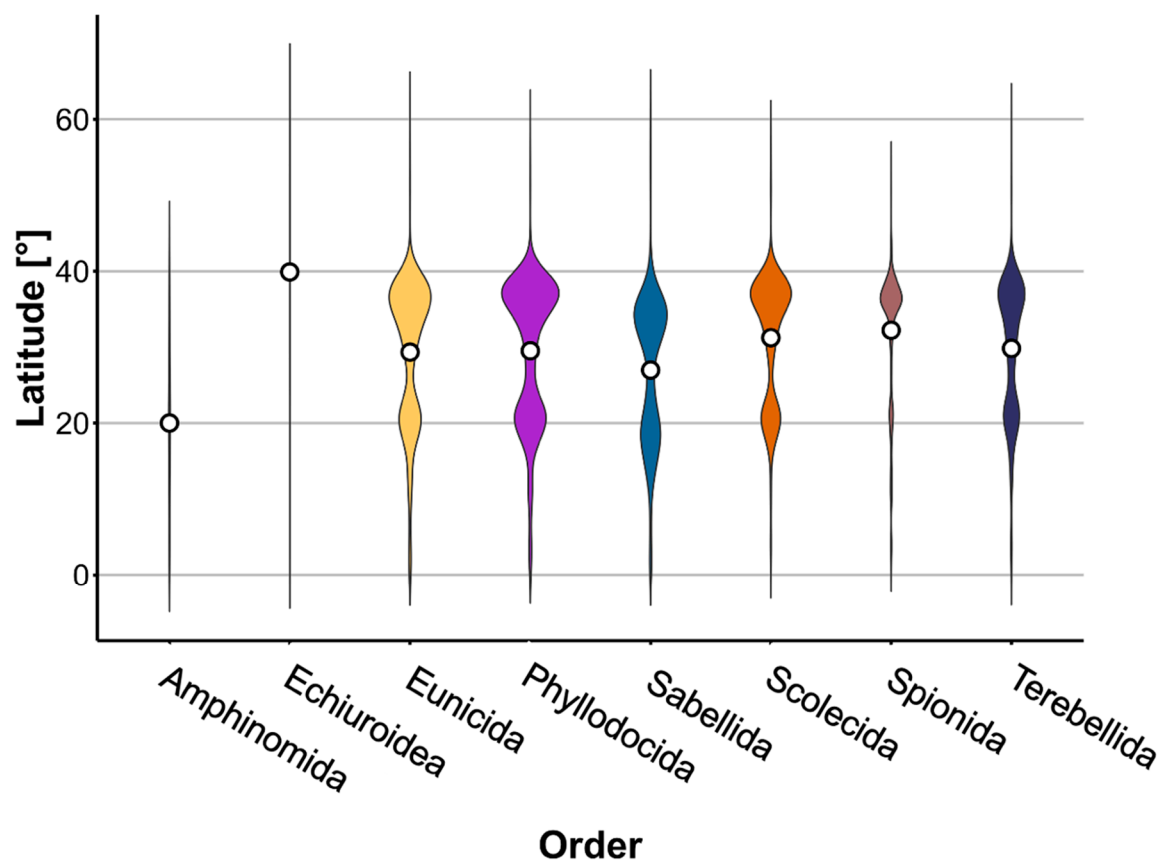

**Figure S7: Violin plot representing the latitudinal distribution of polychaete records for each order across the Northwest Pacific.** The width of the plots is proportional to the number of observations and thus shows sampling intensity. The white dots indicate the median.

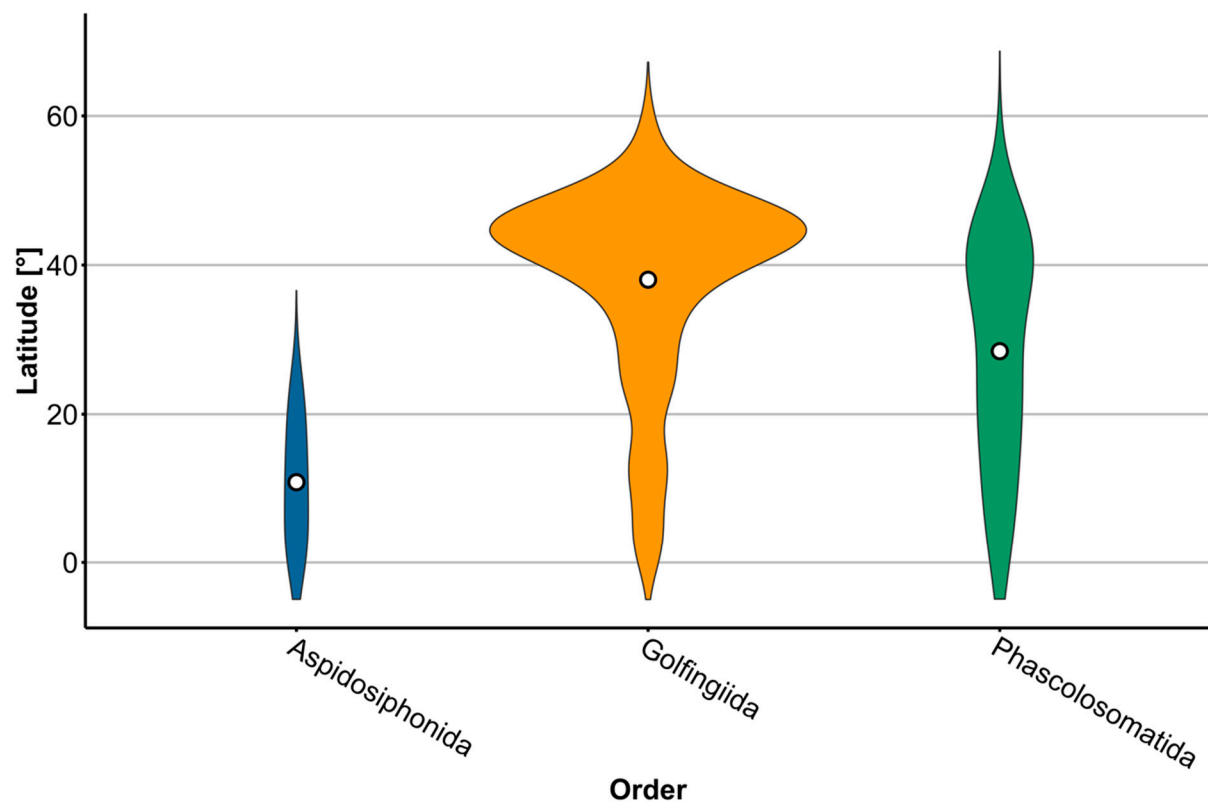

**Figure S8:** Violin plot representing the latitudinal distribution of sipunculan records for each occurring family across the Northwest Pacific. The width of the plots is proportional to the number of observations and thus shows sampling intensity. The white dots indicate the median.

Table S1: Citations of the OBIS dataset.

| ID                                          | Citation                                                                                                                                                                                                                                                                                                |
|---------------------------------------------|---------------------------------------------------------------------------------------------------------------------------------------------------------------------------------------------------------------------------------------------------------------------------------------------------------|
| <b>c998748f-0dd0-4c5f-bb7d-1663ce3dacad</b> | Murina G.V. (2013). Zoobenthos data from different sources (collected and extracted from literature), personal archive of G.V. Murina (IBSS). Dataset published in electronic format by IBSS in 2013, consulted via iOBIS on [date].                                                                    |
| <b>9db24ef5-0c19-4a5b-82a7-be3a31dec4b8</b> | The Plankton Society of Japan, The Japanese Association of Benthology (2018) Plankton&amp                                                                                                                                                                                                               |
| <b>89e23fc8-3f61-4480-9de3-358fe6eefe0b</b> | National Museum of Natural History, Smithsonian Institution NMNH Invertebrate Zoology Collection Database. National Museum of Natural History, Smithsonian Institution, 10th and Constitution Ave. N.W., Washington, DC 20560-0193, 2001, Version 3.2.04 (0802221).                                     |
| <b>b04ae33b-2f2a-4d06-844a-4f2040993fcc</b> | NA                                                                                                                                                                                                                                                                                                      |
| <b>b74b429a-4052-4f5b-bff3-fe0b5a2e8669</b> | WoRMS Editorial Board (2021). Type locality distributions from the World Register of Marine Species. Available from <a href="http://www.marinespecies.org">http://www.marinespecies.org</a> at VLIZ. Accessed on YYYY-MM-DD.                                                                            |
| <b>1518e369-0e28-4734-b85e-bc1c1ed4f00d</b> | Ishida S (2016). Marine Invertebrata specimen database of Osaka Museum of Natutal History. National Institute of Genetics, ROIS. Occurrence dataset <a href="https://doi.org/10.15468/zhubgk">https://doi.org/10.15468/zhubgk</a> accessed via GBIF.org on yyyy-mm-dd.                                  |
| <b>81621597-dfd5-4657-b660-ba0f7924a8e3</b> | NA                                                                                                                                                                                                                                                                                                      |
| <b>517ac935-af0f-4358-88fb-7093015182af</b> | NA                                                                                                                                                                                                                                                                                                      |
| <b>287f44a3-d5b7-4efb-8708-809d1a5323ae</b> | Saeedi H &amp                                                                                                                                                                                                                                                                                           |
| <b>6963aa86-a154-459c-aeb0-0496668512f6</b> | Japan Agency for Marine-Earth Science and Technology (2016 onwards). JAMSTEC Marine Biological Samples Database. <a href="https://doi.org/10.48518/00001">https://doi.org/10.48518/00001</a> . Accessed on yyyy-mm-dd.                                                                                  |
| <b>04e3fd32-b08b-4806-a016-d2dff52ae55a</b> | Jintsu-Uchifune, Y., Yamamoto, H. (2016) Marine organism occurrence data of the Asia-Pacific region extracted from literature. Available at <a href="http://www.godac.jamstec.go.jp/bismal/e/S9-5_Asia-Pacific">http://www.godac.jamstec.go.jp/bismal/e/S9-5_Asia-Pacific</a> . Accessed on yyyy-mm-dd. |
| <b>3425145f-8016-403a-abca-9cb33a29108e</b> | Saeedi H, Winterberg H, Alalykina IL, Bergmeier FS, Downey R, Golovan O, Jazdzewska A, Kamenev GM, Maiorova A, Malyutina M, Minin K, Mordukhovich V, Petrunina A,                                                                                                                                       |

|                                             |                                                                                                                                                                                                                                                                                                                                                                                               |
|---------------------------------------------|-----------------------------------------------------------------------------------------------------------------------------------------------------------------------------------------------------------------------------------------------------------------------------------------------------------------------------------------------------------------------------------------------|
|                                             | Schwabe E, Brandt A (2018): NW Pacific deep-sea benthos distribution and abundance (Beneficial Project). v1.1. Deep-sea OBIS node. Dataset/Samplingevent. <a href="http://ipt.iobis.org/obis-deepsea/resource?r=beneficial_deepsea&amp;">http://ipt.iobis.org/obis-deepsea/resource?r=beneficial_deepsea&amp;</a>                                                                             |
| <b>3ac81162-1804-43c4-b766-aabe2abcc572</b> | The Danish Biodiversity Information Facility, Galathea II, Danish Deep Sea Expedition 1950-52 <a href="https://doi.org/10.15468/ouseij">https://doi.org/10.15468/ouseij</a>                                                                                                                                                                                                                   |
| <b>790f9ddf-433c-4e47-aa6c-ccef0b8634fa</b> | NA                                                                                                                                                                                                                                                                                                                                                                                            |
| <b>d29d7aa5-08e0-4c1f-9b1c-3b46b3b93563</b> | NA                                                                                                                                                                                                                                                                                                                                                                                            |
| <b>2ed8adcd-c829-4928-9a3a-804e58830f24</b> | NA                                                                                                                                                                                                                                                                                                                                                                                            |
| <b>e0605487-fa5e-4d65-bd5e-a77ac47817a3</b> | NA                                                                                                                                                                                                                                                                                                                                                                                            |
| <b>73f31d9e-9c11-402b-9e3d-8ed61f2fcc8c</b> | NA                                                                                                                                                                                                                                                                                                                                                                                            |
| <b>a0a3811f-4040-4ade-aa01-31c91e915938</b> | NA                                                                                                                                                                                                                                                                                                                                                                                            |
| <b>4505624c-fbbd-4abc-833e-14cbb9fadc28</b> | Pamungkas J, Glasby CJ (2019). A checklist of Indonesian polychaete species                                                                                                                                                                                                                                                                                                                   |
| <b>e8f6f42e-0e33-4382-9998-9a178eac3191</b> | Romagnan, J.B., Jalabert, L., Llopiz Monferrer, N., Merland, C., Trudnowska, E., Brandao, M., Elineau, A., Dimier, C., Picheral, M., Searson, S., Kandels-Lewis, S., Tara Oceans Consortium Coordinators, Karsenti, E., Pesant, S., Irisson, J.O., Lombard, F., Stemmann, L., Gorsky, G.                                                                                                      |
| <b>f6e5b0ee-d645-40fc-a433-17fd8965c941</b> | JODC (2013) JODC Dataset. (Available: <a href="http://www.godac.jamstec.go.jp/bismal/j/JODC_J-DOSS">http://www.godac.jamstec.go.jp/bismal/j/JODC_J-DOSS</a> . Accessed: YYYY-MM-DD).                                                                                                                                                                                                          |
| <b>0c59dc30-4b06-4572-addc-155042f81fd0</b> | NA                                                                                                                                                                                                                                                                                                                                                                                            |
| <b>36fcf898-ebc2-493b-aa8b-9f864ffe5494</b> | NA                                                                                                                                                                                                                                                                                                                                                                                            |
| <b>2d120946-a510-4287-a7da-404277ebca5f</b> | NA                                                                                                                                                                                                                                                                                                                                                                                            |
| <b>80479e14-2730-436d-acaa-b63bdc7dd06f</b> | Baranova, O.K, T.D. O'Brien, T.P. Boyer and I.V. Smolyar (2009). Plankton data. Chapter 16 in Boyer, T. P., J. I. Antonov , O. K. Baranova, H. E. Garcia, D. R. Johnson, R. A. Locarnini, A. V. Mishonov, T. D. O'Brien, D. Seidov, I. V. Smolyar, M. M. Zweng, 2009. World Ocean Database 2009. S. Levitus, Ed., NOAA Atlas NESDIS 66, U.S. Gov. Printing Office, Wash., D.C., 216 pp., DVDs |
| <b>21ed84e4-5bb0-4b15-b088-5d3e5880b67e</b> | NA                                                                                                                                                                                                                                                                                                                                                                                            |
| <b>fab2647b-13b6-430d-98f1-31c6d842b372</b> | NA                                                                                                                                                                                                                                                                                                                                                                                            |



|                                             |                                                                                                                                                                                                                                                                                                                                           |
|---------------------------------------------|-------------------------------------------------------------------------------------------------------------------------------------------------------------------------------------------------------------------------------------------------------------------------------------------------------------------------------------------|
| <b>10b213e6-a9c4-459e-a40c-ef9edc461b97</b> | Pyle R (2016). Bernice P. Bishop Museum. Version 8.1. Bernice Pauahi Bishop Museum. Occurrence dataset <a href="https://doi.org/10.15468/s6ctus">https://doi.org/10.15468/s6ctus</a> accessed via GBIF.org on 2018-11-16.                                                                                                                 |
| <b>43b58971-4fda-4210-a6ef-654fe0ce226d</b> | NOAA (2018): National Benthic Inventory. v1. GBIF Secretariat. Dataset/Occurrence. <a href="https://nccos-coastalscience-products-web-ipt.azurewebsites.net/">https://nccos-coastalscience-products-web-ipt.azurewebsites.net/</a>                                                                                                        |
| <b>706a6f92-0fe6-44b0-980a-e5e0fa53166f</b> | Biodiversity Center of Japan, Ministry of the Environment. Data file of tidal flats survey on Monitoring sites 1000 project at <a href="http://www.biodic.go.jp/moni1000/findings/data/index_file_tidalflats.html">http://www.biodic.go.jp/moni1000/findings/data/index_file_tidalflats.html</a> . Accessed on yyyy-mm-dd.                |
| <b>c09b9277-6434-4874-873b-7358e5ed4faa</b> | NA                                                                                                                                                                                                                                                                                                                                        |
| <b>e68c1476-8ef3-4836-9306-c929e05a58f2</b> | NA                                                                                                                                                                                                                                                                                                                                        |
| <b>f53aea86-39eb-48c0-a1b2-639f67081fca</b> | NA                                                                                                                                                                                                                                                                                                                                        |
| <b>f3d7798e-7bf2-4b85-8ed4-18f2c1849d7d</b> | Institut Français de Recherche pour l'Exploitation de la Mer – IFREMER (2016): COMARGIS: Information System on Continental Margin Ecosystems <a href="https://doi.org/10.15468/0djslr">https://doi.org/10.15468/0djslr</a>                                                                                                                |
| <b>f89f543f-ff1b-4a19-9c60-3e0392e18fea</b> | Research Institute of Marine Invertebrates (2018) The 24th field study tour in Sesoko, Okinawa - a citizen science, observations of invertebrates. Available at <a href="https://rimi.or.jp/event/iso2018/">https://rimi.or.jp/event/iso2018/</a> Accessed on yyyy-mm-dd.                                                                 |
| <b>471a8de8-80f8-43f9-9443-88a45712feba</b> | Ramirez-Llodra, E., Blanco, 2005. ChEssBase: an online information system on biodiversity and biogeography of deep-sea fauna from chemosynthetic ecosystems. Version 2. World Wide Web electronic publications, <a href="http://www.noc.soton.ac.uk/chess/database/db_home.php">http://www.noc.soton.ac.uk/chess/database/db_home.php</a> |
| <b>f6b34484-a203-4e59-875d-301b8bc59834</b> | NA                                                                                                                                                                                                                                                                                                                                        |
| <b>62079bf3-19fc-4a28-9064-4134b7dbe98b</b> | NA                                                                                                                                                                                                                                                                                                                                        |
| <b>f75ab2b5-a9df-4030-9e15-ee3598143887</b> | NA                                                                                                                                                                                                                                                                                                                                        |
| <b>c3b2259c-48ab-45ad-bf9b-024163aeb541</b> | NA                                                                                                                                                                                                                                                                                                                                        |
| <b>579ff94c-c6a5-4589-9903-8ce3db8051d1</b> | NA                                                                                                                                                                                                                                                                                                                                        |
| <b>e972a6ab-3015-433a-8ad9-705d4939a28f</b> | NA                                                                                                                                                                                                                                                                                                                                        |
| <b>a0737a06-66ef-41e7-9458-9c05f53340b5</b> | McGrouther M (2022): Australian Museum Ichthyology Collection. v1.11. CSIRO National Collections and Marine Infrastructure (NCMI) Information and Data Centre                                                                                                                                                                             |

|                                             |                                                                                                                                                                                                                                                                            |
|---------------------------------------------|----------------------------------------------------------------------------------------------------------------------------------------------------------------------------------------------------------------------------------------------------------------------------|
|                                             | (IDC). Dataset/Occurrence.<br><a href="https://www.marine.csiro.au/ipt/resource?r=am_ichthyology&amp;">https://www.marine.csiro.au/ipt/resource?r=am_ichthyology&amp;</a>                                                                                                  |
| <b>fb62aeed-6025-4ee7-8f64-2f89e1d549f2</b> | Indian Ocean Biodiversity Information System (IndOBIS)- Distribution records of marine organisms from the Indian Ocean.                                                                                                                                                    |
| <b>00f47c38-6233-4d6c-bd93-67a771ab6224</b> | Senckenberg: Collection Polychaeta SMF <a href="https://doi.org/10.15468/ehpqkw">https://doi.org/10.15468/ehpqkw</a>                                                                                                                                                       |
| <b>73b8993b-0afd-49c0-8321-7cbbc112801d</b> | NA                                                                                                                                                                                                                                                                         |
| <b>97bdf279-6f78-4ed7-ad9d-27a5886f8ff2</b> | T_rkay, M. Senckenbergisches Sammlungsverwaltungssystem, SeSam.<br>Senckenbergische Naturforschende Gesellschaft , Frankfurt, Germany.<br><a href="http://sesam.senckenberg.de/">http://sesam.senckenberg.de/</a>                                                          |
| <b>1633768d-17b0-454a-8d32-be3500a84a9e</b> | NA                                                                                                                                                                                                                                                                         |
| <b>58e6252a-971f-4249-af6c-20d9ea918f02</b> | Indian Ocean Biodiversity Information System (IndOBIS)- Distribution records of marine organisms from the Indian Ocean.                                                                                                                                                    |
| <b>03ed2433-0f53-4299-83d6-b5bca6f2a5a3</b> | NA                                                                                                                                                                                                                                                                         |
| <b>d0d2a510-ba24-487b-80ca-afc86922cb1c</b> | Chavan, Vishwas and C. T. Achuthankutty (editors), IndOBIS Catalogue of Life,<br>Available at <a href="http://www.indobis.org/">http://www.indobis.org/</a> , Retrived day, date, year                                                                                     |
| <b>a4742f1e-c0e3-43a4-8787-6e0e53975248</b> | China Ocean Mineral Resources Research and Development Association, (2016).<br>COMRACRFC12016 Env Template DY37 megafauna. Available : DeepData,<br>International Seabed Authority <a href="https://data.isa.org.jm/">https://data.isa.org.jm/</a> Accessed: [YYYY-MM-DD]. |
| <b>6d814d91-cb98-4d6b-aae3-998ac7b43d32</b> | NA                                                                                                                                                                                                                                                                         |
| <b>f17d8dae-4125-4a45-a491-81f8d018e19c</b> | NA                                                                                                                                                                                                                                                                         |
| <b>e84e4864-bb77-486d-9940-d784014dd2fc</b> | NA                                                                                                                                                                                                                                                                         |
| <b>9d629feb-ba03-4a83-908c-794d94d30531</b> | Accession ID OGL-#####. The Ocean Genome Legacy Center. Northeastern University.<br>Published on the web at <a href="http://ogl.northeastern.edu/catalog">ogl.northeastern.edu/catalog</a> .                                                                               |
| <b>b920c161-c295-4a73-b9a4-96ab1ab0b357</b> | NA                                                                                                                                                                                                                                                                         |
| <b>d104db68-63cf-4f34-b92a-54bd55a07394</b> | NA                                                                                                                                                                                                                                                                         |
| <b>e971710e-054e-43f2-b23c-c149d6c76cb4</b> | Bertrand RICHER DE FORGES (IRD) & amp                                                                                                                                                                                                                                      |

|                                             |                                                                                                                                                                                          |
|---------------------------------------------|------------------------------------------------------------------------------------------------------------------------------------------------------------------------------------------|
| <b>da77ef95-bff6-43f9-8af8-2a1dfa400ba8</b> | Coral Reef Ecosystem Division (CRED), NOAA Pacific Island Fisheries Science Center, 2008-05-08, CRED Rapid Ecological Assessment of Invertebrate in the Pacific Ocean, from 2002 to 2008 |
| <b>fa9bc19f-f98a-4278-ab99-c6d8ef4966c7</b> | NA                                                                                                                                                                                       |
| <b>28ccee1e-8f1a-400b-a112-86536192a402</b> | NA                                                                                                                                                                                       |
| <b>2c6db58f-ae91-4a17-9f0f-7db28506b94f</b> | NA                                                                                                                                                                                       |
| <b>731e318c-d692-4d6b-b4cc-edff0d385098</b> | NA                                                                                                                                                                                       |
| <b>4d2a31a3-bb76-4ffe-a2f9-817e975f6ba9</b> | NA                                                                                                                                                                                       |
| <b>bf742ba6-3957-448f-b5bc-d7beb39dc1f6</b> | NA                                                                                                                                                                                       |
| <b>71748d53-57e9-4e30-9678-ed83ca6c7ba</b>  | NA                                                                                                                                                                                       |
| <b>9f14fcfe-b8c4-4614-82de-3f76eb47ed7f</b> | NA                                                                                                                                                                                       |
| <b>56e55f76-6dda-403d-805b-f8922fa1766d</b> | NA                                                                                                                                                                                       |
| <b>0b7ba344-5ff5-4a72-8e20-43eb86b097da</b> | NA                                                                                                                                                                                       |
| <b>e8c110c1-0116-4fb3-abcb-58fab68e79c1</b> | NA                                                                                                                                                                                       |
| <b>a1beaeb4-b27c-4b26-9783-2861984d8e4a</b> | NA                                                                                                                                                                                       |
| <b>e8aac3a4-19e4-4940-88d5-f5364c26e1ff</b> | NA                                                                                                                                                                                       |
| <b>0ff2a317-589a-4a3c-8f87-cd37173da0d6</b> | NA                                                                                                                                                                                       |
| <b>2e34a667-0140-40a4-a5c3-a4b0e37ae88c</b> | NA                                                                                                                                                                                       |
| <b>0912e81c-c5ac-4a53-b719-a9ae6535f895</b> | NA                                                                                                                                                                                       |
| <b>e981eab6-f849-4891-8fac-495852829456</b> | NA                                                                                                                                                                                       |
| <b>fc2a1bf-d057-469e-ae1e-5b734d6b0a9a</b>  | NA                                                                                                                                                                                       |
| <b>c9b40d2d-e9c7-4d2d-af55-005fff4e4c7b</b> | NA                                                                                                                                                                                       |
| <b>c04414fb-9ac0-42d2-be21-f0754f416e04</b> | NA                                                                                                                                                                                       |
| <b>a9b5a5e3-6be6-4019-95e3-87a124e0a949</b> | NA                                                                                                                                                                                       |
| <b>4f46f9d8-dc63-4546-9dd5-075df3d25e4a</b> | NA                                                                                                                                                                                       |
| <b>f072e2e5-6b80-4eb4-9806-0f4c3d2fe3b4</b> | NA                                                                                                                                                                                       |
| <b>a4257cff-3c2c-4a60-ab29-91f65545bb08</b> | NA                                                                                                                                                                                       |
| <b>858c8d4a-e8df-4c89-9f4d-c6517b4082c9</b> | NA                                                                                                                                                                                       |

|                                      |    |
|--------------------------------------|----|
| 36fbc01b-72bd-42f0-af0a-e1701cddcf94 | NA |
| 01c220e5-fe9a-4412-b3d8-609c41aa69fa | NA |
| 270f3e70-ff9b-411d-b170-2bc914d83f26 | NA |
| 564d447c-4974-4938-b88c-a17a65603d8f | NA |
| 17ce69d0-2504-4ae3-bc87-16b096863f51 | NA |
| e72b87e0-6a52-4e94-a0b0-f0401d41841f | NA |
| 8b5b2a47-e4ed-4da9-8230-da0783a5e47b | NA |
| 750650f1-5f72-46d8-a65d-996ee2268fec | NA |
| 46db556a-f04a-46c9-9000-db1a877512eb | NA |
| 48202606-f758-4974-ab2b-57aa154190e3 | NA |
| a145f369-b272-46f7-86bc-08412b1ee927 | NA |
| 542ff33e-07a8-4a98-b6df-2b5371177f4a | NA |
| 5ea4f836-9e28-4542-ac4a-af10630fbb7a | NA |
| 5ed4177f-5460-45c0-83cf-a98b1c5a8410 | NA |
| 422c3f13-db22-4bb0-b9bd-98d09ac2f6ab | NA |
| 248d4349-7c65-4291-b849-57127a20aec8 | NA |
| bbb88dbe-51dd-4f8a-a51a-95b06c92f821 | NA |
| 2c9890c1-45f9-4ac7-a61a-3ec987659045 | NA |
| dd1b9626-4dc8-47a1-b928-87e0cecea9f6 | NA |
| aa60750c-4921-43e1-8146-7b16aad675ac | NA |
| b58d5ca0-1af8-48b3-993d-6c89742bb0d2 | NA |
| b1363fbb-afec-4dc7-85b6-39b8a5ebb55c | NA |
| 38535a43-2982-4479-88c1-8303f7ee8665 | NA |
| 56f36466-ae02-43bc-bc2f-a0fc02c174f8 | NA |
| e59f3fe1-8594-4dc4-81a2-58ddfa2a4026 | NA |
| 6ced1167-d236-4a60-a783-b0ea06b49ff0 | NA |
| 36b58f28-0a03-4447-b688-e4eed56afa3d | NA |
